# Supplementary material for: High-Throughput DNA Metabarcoding as an Approach for Ichthyoplankton Survey in Oujiang River Estuary, China
Source: MDPI journal article supplement (doi:10.3390/d14121111), 2022-12-14
Supplement: s1 [file s1]

Supplementary Table S1. List of identified fish species in Oujiang River Estuary; taxonomy description; identification method; sampling month.

| Taxonomy description |                    |                                   | Identification method |       |            | Sampling month |     |      |      |        |
|----------------------|--------------------|-----------------------------------|-----------------------|-------|------------|----------------|-----|------|------|--------|
| Family               | Genus              | Species name                      | 12S                   | Cyt b | Morphology | April          | May | June | July | August |
| Acanthuridae         | Acanthurus         | <i>Acanthurus lineatus</i>        | +                     |       |            | +              |     |      |      | +      |
| Chlopsidae           | Robinsia           | <i>Robinsia catherinae</i>        | +                     |       |            |                |     |      | +    | +      |
| Muraenesocidae       | Gavialiceps        | <i>Gavialiceps taeniola</i>       | +                     |       |            |                | +   |      | +    |        |
| Nettastomatidae      | Saurenehelys       | <i>Saurenehelys fierasfer</i>     | +                     |       |            |                |     |      | +    |        |
|                      |                    | <i>Melanotaenia sexlineata</i>    | +                     |       |            | +              | +   | +    | +    | +      |
|                      |                    | <i>Melanotaenia splendida</i>     | +                     |       |            | +              | +   | +    | +    | +      |
| Melanotaeniidae      | Melanotaenia       | <i>Melanotaenia trifasciata</i>   | +                     |       |            | +              |     | +    |      |        |
|                      |                    | <i>Hyporhamphus intermedius</i>   | +                     |       |            |                | +   | +    |      | +      |
|                      |                    | <i>Hemiramphus sp</i>             |                       |       | +          | +              | +   |      |      |        |
| Hemiramphidae        | Hyporhamphus       | <i>Hyporhamphus sajori</i>        | +                     |       |            |                | +   | +    | +    | +      |
|                      | <i>Terapon</i>     | <i>Terapon jarbua</i>             |                       |       | +          |                |     |      |      | +      |
| Theraponidae         | Rhynchopelates     | <i>Rhynchopelates oxyrhynchus</i> | +                     |       |            |                |     |      |      | +      |
|                      |                    | <i>Coilia mystus</i>              | +                     |       | +          | +              | +   | +    | +    | +      |
|                      |                    | <i>Coilia nasus</i>               | +                     | +     | +          | +              | +   | +    | +    | +      |
|                      |                    | <i>Coilia lindmani</i>            |                       | +     |            | +              | +   | +    | +    | +      |
|                      | <i>Coilia</i>      | <i>Coilia reynaldi</i>            | +                     |       |            | +              |     | +    | +    | +      |
|                      | <i>Engraulis</i>   | <i>Engraulis japonicus</i>        | +                     | +     |            | +              | +   | +    | +    | +      |
|                      | <i>Lycothrissa</i> | <i>Lycothrissa crocodilus</i>     | +                     |       |            | +              | +   | +    | +    | +      |
|                      |                    | <i>Stolephorus chinensis</i>      | +                     |       |            | +              |     | +    | +    | +      |
|                      |                    | <i>Stolephorus waitei</i>         |                       | +     |            | +              | +   |      | +    |        |
| Engraulidae          | Stolephorus        | <i>Stolephorus sp</i>             |                       |       | +          |                |     | +    | +    | +      |
| Pristigasteridae     | Ilisha             | <i>Ilisha elongata</i>            | +                     | +     | +          | +              |     | +    | +    | +      |
|                      |                    | <i>Acrossocheilus monticola</i>   | +                     |       |            | +              | +   | +    | +    | +      |
| Cyprinidae           | Acrossocheilus     | <i>Acrossocheilus iridescens</i>  |                       | +     |            |                |     | +    | +    |        |

|                 |                        |                                |   |   |   |   |   |   |    |
|-----------------|------------------------|--------------------------------|---|---|---|---|---|---|----|
|                 | <i>Culter</i>          | <i>Culter alburnus</i>         |   |   | + |   |   |   | +  |
|                 | <i>Cyprinella</i>      | <i>Cyprinella venusta</i>      | + |   |   | + |   | + | +  |
|                 |                        | <i>Cyprinus sp</i>             |   | + |   |   | + | + | +  |
|                 | <i>Cyprinus</i>        | <i>Cyprinus carpio</i>         | + | + |   |   | + | + | +  |
|                 | <i>Carassius</i>       | <i>Carassius auratus</i>       |   | + | + | + |   |   | +  |
|                 | <i>Cirrhinus</i>       | <i>Cirrhinus reba</i>          |   | + |   |   |   | + |    |
|                 | <i>Mylopharyngodon</i> | <i>Mylopharyngodon piceus</i>  | + |   |   |   | + | + | +  |
|                 | <i>Cosmochilus</i>     | <i>Cosmochilus harmandi</i>    |   | + |   |   | + |   |    |
|                 | <i>Pseudolaubuca</i>   | <i>Pseudolaubuca engraulis</i> | + |   |   | + | + | + | +  |
|                 | <i>Pseudorasbora</i>   | <i>Pseudorasbora parva</i>     | + | + |   | + | + |   |    |
|                 | <i>Squalidus</i>       | <i>Squalidus argentatus</i>    | + |   |   |   | + | + |    |
|                 | <i>Xenocypris</i>      | <i>Xenocypris davidi</i>       | + |   |   |   | + | + | +  |
|                 | <i>Thynnichthys</i>    | <i>Thynnichthys thynnoides</i> |   | + |   | + | + | + |    |
|                 | <i>Trigonostigma</i>   | <i>Trigonostigma espei</i>     |   | + |   | + | + | + | +  |
|                 |                        | <i>Cyprinidae sp1</i>          |   |   | + |   | + |   |    |
|                 |                        | <i>Cyprinidae sp2</i>          |   |   | + |   |   | + |    |
|                 |                        | <i>Cyprinidae sp3</i>          |   |   | + |   | + |   |    |
|                 |                        | <i>Cyprinidae sp4</i>          |   |   | + |   |   |   |    |
| Callionymidae   | <i>Callionymus</i>     | <i>Callionymus virgis</i>      |   |   | + | + |   |   |    |
|                 |                        | <i>Aphanius danfordii</i>      | + |   |   |   |   | + | +  |
|                 |                        | <i>Aphanius fasciatus</i>      | + |   |   |   | + |   | +  |
| Cyprinodontidae | <i>Aphanius</i>        | <i>Aphanius vladykovi</i>      | + |   |   | + |   | + | +  |
| Poeciliidae     | <i>Phallichthys</i>    | <i>Phallichthys amates</i>     | + |   |   | + |   | + | +  |
|                 |                        | <i>Megalops cyprinoides</i>    | + | + | + |   | + | + | +  |
| Megalopidae     | <i>Megalops</i>        | <i>Megalops atlanticus</i>     |   | + |   |   | + |   |    |
| Bregmacerotidae | <i>Bregmaceros</i>     | <i>Bregmaceros nectabanus</i>  | + |   |   |   | + | + |    |
| Eleotridae      | <i>Bostrychus</i>      | <i>Bostrychus sinensis</i>     | + |   |   | + | + | + | +  |
|                 |                        | <i>Acanthogobius hasta</i>     | + |   |   | + |   | + | ++ |
| Gobiidae        | <i>Acanthogobius</i>   | <i>Acanthogobius ommaturus</i> |   |   | + |   |   | + | +  |

|                            |                                      |   |   |   |   |   |   |   |   |
|----------------------------|--------------------------------------|---|---|---|---|---|---|---|---|
|                            | <i>Acentrogobius pflaumii</i>        | + |   |   | + | + | + |   |   |
| <i>Amblychaeturichthys</i> | <i>Amblychaeturichthys hexanema</i>  |   | + |   | + |   |   | + |   |
| Amoya                      | <i>Amoya chusanensis</i>             | + |   |   |   |   |   |   |   |
| <i>Chaeturichthys</i>      | <i>Chaeturichthys stigmatias</i>     |   | + |   | + |   |   |   |   |
| <i>Boleophthalmus</i>      | <i>Boleophthalmus pectinirostris</i> | + |   |   | + | + | + | + | + |
| <i>Cryptocentrus</i>       | <i>Cryptocentrus cinctus</i>         | + |   |   |   | + | + | + | + |
| <i>Ctenotrypauchen</i>     | <i>Ctenotrypauchen chinensis</i>     |   | + |   |   |   |   | + |   |
|                            | <i>Eugnathogobius oligactis</i>      | + |   |   |   | + |   | + |   |
| <i>Eugnathogobius</i>      | <i>Eugnathogobius polylepis</i>      | + |   |   | + | + |   | + | + |
| <i>Favonigobius</i>        | <i>Favonigobius gymnauchen</i>       | + |   |   | + | + | + | + | + |
|                            | <i>Glossogobius aureus</i>           | + |   |   |   |   |   | + | + |
|                            | <i>Glossogobius olivaceus</i>        |   | + |   |   |   |   | + |   |
| <i>Glossogobius</i>        | <i>Glossogobius sp.</i>              | + |   |   |   |   |   | + | + |
| <i>Hemigobius</i>          | <i>Hemigobius hoevenii</i>           | + |   |   | + | + |   | + | + |
|                            | <i>Mugilogobius abei</i>             | + |   |   | + | + | + | + | + |
| <i>Mugilogobius</i>        | <i>Mugilogobius sp.</i>              | + |   |   | + | + | + | + | + |
|                            | <i>Odontamblyopus lacepedii</i>      | + |   |   | + | + | + | + | + |
| <i>Odontamblyopus</i>      | <i>Odontamblyopus rubicundus</i>     | + |   |   | + | + | + | + | + |
| <i>Oxuderces</i>           | <i>Oxuderces dentatus</i>            | + |   |   |   |   |   | + | + |
| <i>Parachaeturichthys</i>  | <i>Parachaeturichthys polynema</i>   |   | + |   |   |   | + |   |   |
| <i>Periophthalmus</i>      | <i>Periophthalmus cantonensis</i>    | + |   |   | + | + |   | + | + |
| <i>Pseudogobius</i>        | <i>Pseudogobius taijiangensis</i>    | + |   |   |   |   |   | + |   |
|                            | <i>Rhinogobius cliffordpopei</i>     | + |   |   | + |   |   |   |   |
|                            | <i>Rhinogobius giurinus</i>          | + | + |   |   | + | + | + |   |
| <i>Rhinogobius</i>         | <i>Rhinogobius sp.</i>               |   | + |   |   | + |   |   |   |
| <i>Scartelaos</i>          | <i>Scartelaos histophorus</i>        | + | + | + | + | + | + | + | + |
|                            | <i>Sicyopterus japonicus</i>         | + |   | + | + | + | + | + | + |
| <i>Sicyopterus</i>         | <i>Taenioides cirratus</i>           |   | + |   |   |   |   | + | + |
| <i>Taenioides</i>          | <i>Taenioides sp.</i>                | + |   |   |   | + | + | + | + |

|                 |               |                                    |   |  |   |   |   |   |   |   |
|-----------------|---------------|------------------------------------|---|--|---|---|---|---|---|---|
|                 |               | <i>Tridentiger barbatus</i>        | + |  | + | + | + | + | + | + |
|                 |               | <i>Tridentiger bifasciatus</i>     |   |  | + | + |   |   |   |   |
|                 | Tridentiger   | <i>Trypauchen sp</i>               | + |  |   | + | + | + | + | + |
|                 | Trypauchen    | <i>Trypauchen vagina</i>           | + |  |   | + | + | + | + | + |
|                 | Luciogobius   | <i>Luciogobius elongatus</i>       |   |  | + |   |   |   | + |   |
|                 |               | <i>Gobiidae sp</i>                 |   |  | + | + |   | + | + |   |
| Haemulidae      | Diagramma     | <i>Diagramma picta</i>             | + |  |   | + | + | + | + | + |
|                 |               | <i>Planiliza affinis</i>           | + |  |   | + | + | + | + | + |
|                 | Planiliza     | <i>Planiliza haematocheila</i>     |   |  | + | + | + |   |   |   |
| Mugilidae       | Mugil         | <i>Mugil cephalus</i>              | + |  | + | + | + | + | + | + |
|                 | Diaphus       | <i>Diaphus splendidus</i>          | + |  |   | + | + | + | + | + |
| Myctophidae     | Triphoturus   | <i>Triphoturus nigrescens</i>      |   |  | + |   |   |   |   |   |
| Eleutheronema   | Eleutheronema | <i>Eleutheronema tetradactylum</i> | + |  |   | + |   |   | + |   |
|                 | Argyrosomus   | <i>Argyrosomus japonicus</i>       | + |  |   |   | + |   | + |   |
|                 | Collichthys   | <i>Collichthys lucidus</i>         | + |  | + | + | + | + | + | + |
|                 |               | <i>Larimichthys crocea</i>         | + |  |   | + | + |   |   | + |
|                 | Larimichthys  | <i>Larimichthys polyactis</i>      | + |  | + | + | + | + | + | + |
|                 | Pennahia      | <i>Pennahia argentata</i>          | + |  |   | + | + | + | + | + |
|                 | Nibea         | <i>Nibea mitsukurii</i>            |   |  | + |   | + |   |   |   |
| Sciaenidae      | Sciaenops     | <i>Sciaenops ocellatus</i>         | + |  |   |   |   |   |   | + |
|                 |               | <i>Lateolabrax japonicus</i>       |   |  | + | + | + | + | + | + |
| Lateolabracidae | Lateolabrax   | <i>Lateolabrax maculatus</i>       | + |  |   | + | + | + | + | + |
| Platycephalidae | Platycephalus | <i>Platycephalus indicus</i>       | + |  | + | + | + | + | + | + |
| Priacanthidae   | Priacanthus   | <i>Priacanthus macracanthus</i>    | + |  |   |   |   | + |   |   |
| Blenniidae      |               | <i>Blenniidae sp.</i>              |   |  | + |   |   |   |   | + |
| Stromateidae    | Pampus        | <i>Pampus sp</i>                   | + |  |   | + | + | + | + | + |
| Doradidae       | Hemidoras     | <i>Hemidoras morrissi</i>          | + |  |   |   | + | + |   |   |
|                 | Rineloricaria | <i>Rineloricaria stewarti</i>      | + |  |   | + | + | + | + |   |
| Loricariidae    | Sturisoma     | <i>Sturisoma aureum</i>            | + |  |   |   |   |   | + |   |

|                   |                      |                                   |   |  |   |   |   |   |   |
|-------------------|----------------------|-----------------------------------|---|--|---|---|---|---|---|
| Schilbeidae       | Pareutropius         | <i>Pareutropius debauwi</i>       | + |  |   |   |   |   | + |
| Syngnathidae      | <i>Syngnathus</i>    | <i>Syngnathus acus</i>            |   |  | + |   |   |   | + |
| Ophidiidae        | <i>Bassozetus</i>    | <i>Bassozetus zenkevitchi</i>     |   |  | + |   |   | + |   |
| Siluridae         | Wallago              | <i>Wallago attu</i>               | + |  |   | + | + | + |   |
| Sparidae          | <i>Acanthopagrus</i> | <i>Acanthopagrus schlegelii</i>   | + |  |   |   |   |   | + |
| Siganidae         | <i>Siganus</i>       | <i>Siganus fuscescens</i>         |   |  | + |   | + |   |   |
| Pegasidae         | Pegasus              | <i>Pegasus volitans</i>           | + |  |   | + |   |   |   |
| Monacanthidae     | Aluterus             | <i>Aluterus monoceros</i>         | + |  |   |   |   |   | + |
|                   |                      | <i>Takifugu rubripes</i>          | + |  |   | + | + | + |   |
|                   |                      | <i>Takifugu xanthopterus</i>      |   |  | + | + |   | + | + |
|                   |                      | <i>Takifugu fasciatus</i>         |   |  | + |   |   |   | + |
|                   |                      | <i>Takifugu obscurus</i>          |   |  | + |   | + | + |   |
|                   |                      | <i>Takifugu ocellatus</i>         |   |  | + |   | + |   |   |
|                   |                      | <i>Takifugu sp</i>                |   |  | + | + | + |   |   |
| Tetraodontidae    | Lagocephalus         | <i>Lagocephalus wheeleri</i>      |   |  | + |   |   |   | + |
|                   |                      | <i>Lagocephalus lagocephalus</i>  |   |  | + |   |   |   | + |
| Serranidae        | Epinephelus          | <i>Epinephelus merra</i>          |   |  | + |   |   | + | + |
| Moringuidae       | Moringua             | <i>Moringua microchir</i>         |   |  | + | + | + | + | + |
| Serrivomeridae    | Serrivomer           | <i>Serrivomer sector</i>          |   |  | + | + | + |   |   |
| Atherinidae       | Hypoatherina         | <i>Hypoatherina tsurugae</i>      |   |  | + | + | + |   |   |
| Chlorophthalmidae | Chlorophthalmus      | <i>Chlorophthalmus agassizi</i>   |   |  | + |   | + | + | + |
| Adrianichthyidae  | Oryzias              | <i>Oryzias latipes</i>            |   |  | + | + | + | + | + |
| Belonidae         | Ablennes             | <i>Ablennes hians</i>             |   |  | + |   |   |   | + |
| Carangidae        | Carangoides          | <i>Carangoides armatus</i>        |   |  | + | + | + | + | + |
| Kyphosidae        | Microcanthus         | <i>Microcanthus strigatus</i>     |   |  | + |   | + |   | + |
| Cobitidae         | Misgurnus            | <i>Misgurnus anguillicaudatus</i> |   |  | + | + | + | + | + |
| Bregmacerotidae   | Bregmaceros          | <i>Bregmaceros nectabanus</i>     |   |  | + | + | + | + | + |
| Holocentridae     | Ostichthys           | <i>Ostichthys japonicus</i>       |   |  | + | + |   |   |   |
| Himantolophidae   | Himantolophus        | <i>Himantolophus albinares</i>    |   |  | + |   |   | + | + |

|                 |                      |                                |   |   |   |   |   |   |
|-----------------|----------------------|--------------------------------|---|---|---|---|---|---|
| Scorpaenidae    | Pterois              | <i>Pterois mombasae</i>        | + |   | + |   |   |   |
| Bramidae        | Taractes             | <i>Taractes asper</i>          | + |   |   |   | + |   |
| Tetragonuridae  | Tetragonurus         | <i>Tetragonurus atlanticus</i> | + | + | + | + | + | + |
| Mastacembelidae | Mastacembelus        | <i>Mastacembelus favius</i>    | + | + | + |   |   |   |
| Centriscidae    | Aeoliscus            | <i>Aeoliscus strigatus</i>     | + |   |   |   | + |   |
| Draconettidae   | Draconetta           | <i>Draconetta xenica</i>       | + | + | + | + | + | + |
| Salmoninae      | <i>Oncorthynchus</i> | <i>Oncorthynchus mosou</i>     | + |   | + |   |   |   |
